# Supplementary material for: Hydroxychalcone dyes that serve as color indicators for pH and fluoride ions
Source: Royal Society of Chemistry journal article supplement (doi:10.1039/d0ra06719a), 2020-01-01

## Supporting Information

### **Hydroxychalcone dyes that serve as color indicators for pH and fluoride ions**

Yanqing Du,<sup>a</sup> Fengying Liang,<sup>a</sup> Mixia Hu,<sup>a</sup> Ren Bu,<sup>a</sup> Meiling Wang,<sup>a</sup>  
Akihiko Tsuda\*<sup>a,b</sup> and Chaolu Eerdun\*<sup>a</sup>

<sup>a</sup> Department of Pharmaceutical Sciences, Inner Mongolia Medical  
University, Jinshan Economic & Technology Development District,  
Hohhot, Inner Mongolia 010110, China

<sup>b</sup> Department of Chemistry, Graduate School of Science, Kobe University,  
1-1 Rokkodai-cho, Nada-ku, Kobe 657-8501, Japan

## Contents

|                                                                                             |     |
|---------------------------------------------------------------------------------------------|-----|
| 1. Checklist of characterization data of all compounds .....                                | S3  |
| 2. UV-vis absorption spectral titrations and Job plots of CLN5 and CLN6 with TBAF.....      | S5  |
| 3. Changes in the <sup>1</sup> H NMR spectra of CLN2 upon mixing with TBAF .....            | S6  |
| 4. UV-vis absorption spectra of CLN1 and CLN1+TBAF in CH <sub>2</sub> Cl <sub>2</sub> ..... | S7  |
| 5. Mass spectra .....                                                                       | S8  |
| 6. <sup>1</sup> H and <sup>13</sup> C NMR spectra .....                                     | S11 |

## 1. Checklist of characterization data of all compounds

| Compound                                                                                    | Know/Unknown | <sup>1</sup> H NMR | <sup>13</sup> C NMR | HRMS | UV-Vis |
|---------------------------------------------------------------------------------------------|--------------|--------------------|---------------------|------|--------|
| 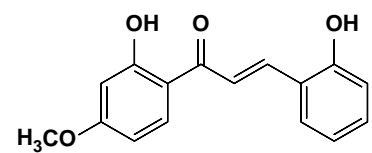<br>CLN1   | Unknown      | √                  | √                   | √    | √      |
| <br>CLN2   | Unknown      | √                  | √                   | √    | √      |
| <br>CLN3 | Unknown      | √                  | √                   | √    | √      |

| Compound                                                                                        | Know/Unknown | <sup>1</sup> H NMR | <sup>13</sup> C NMR | HRMS | UV-Vis |
|-------------------------------------------------------------------------------------------------|--------------|--------------------|---------------------|------|--------|
| 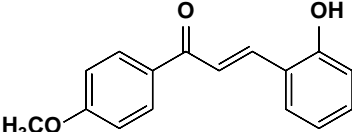 <p>CLN4</p>   | Unknown      | √                  | √                   | √    | √      |
|  <p>CLN5</p>   | Unknown      | √                  | √                   | √    | √      |
|  <p>CLN6</p> | Unknown      | √                  | √                   | √    | √      |

## 2. UV-vis absorption spectral titrations and Job plots of CLN5 and CLN6 with TBAF

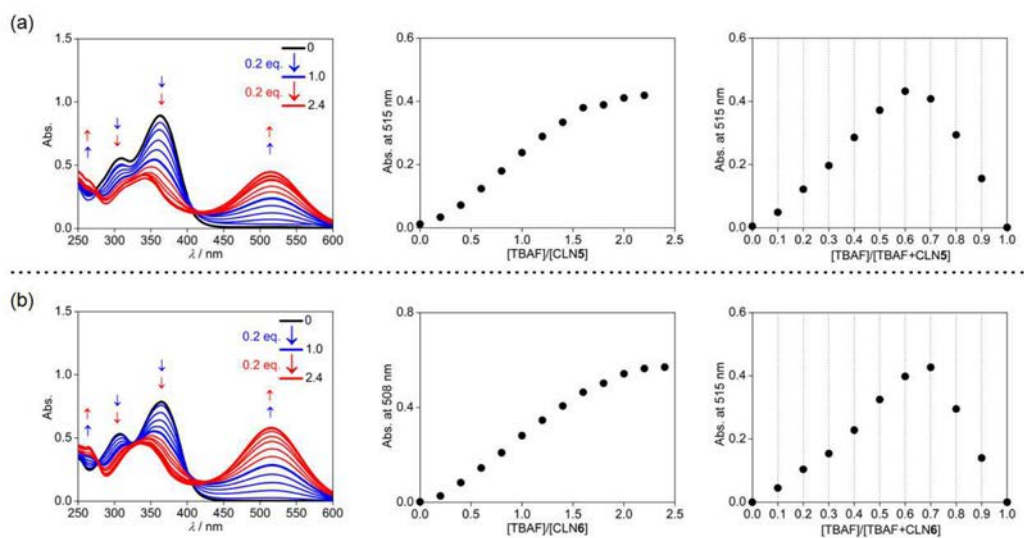

**Fig. 1** UV-vis absorption spectral titrations of (a) CLN5 ( $4.0 \times 10^{-5} \text{ mol}\cdot\text{L}^{-1}$ ) and (b) CLN6 ( $4.0 \times 10^{-5} \text{ mol}\cdot\text{L}^{-1}$ ) with TBAF in  $\text{CH}_3\text{CN}$  at 298 K (left), plots of the absorbance changes at  $\lambda_{max}$  with respect to  $[\text{TBAF}]/[\text{CLN}]$  (centre), and Job plots for the absorbance changes with respect to  $[\text{TBAF}]/[\text{TBAF} + \text{CLN}]$  (right).

### 3. Changes in the $^1\text{H}$ NMR spectra of CLN2 upon mixing with TBAF

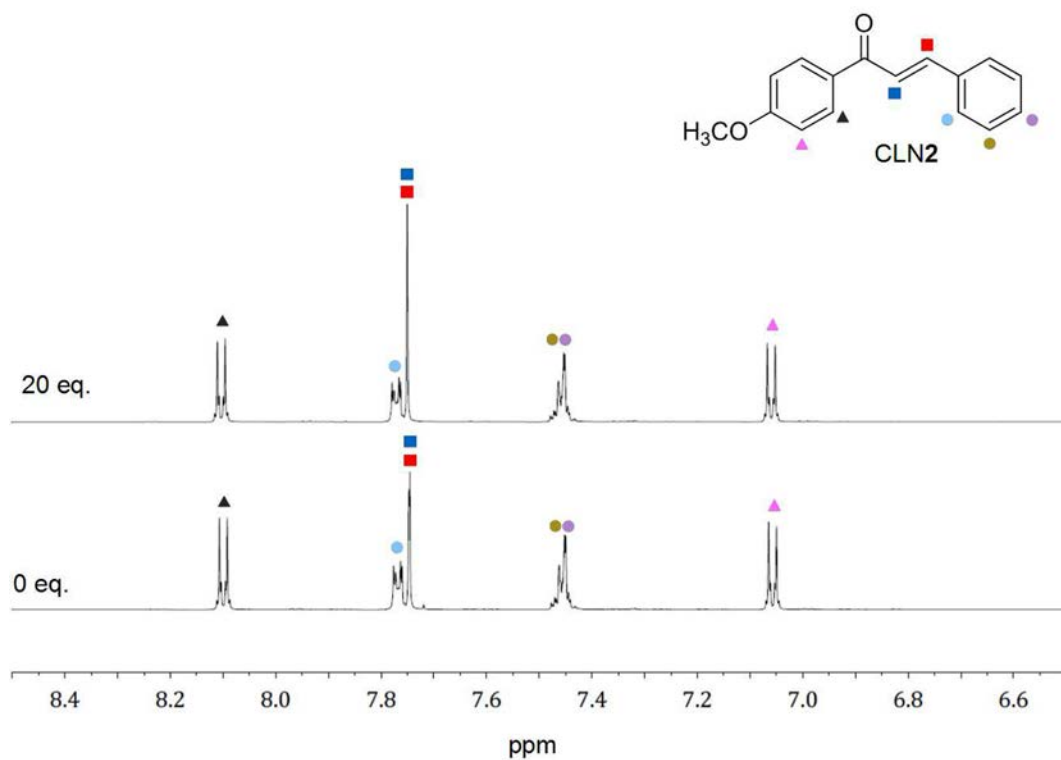

**Fig.2** Changes in the  $^1\text{H}$  NMR spectra (600 MHz) of CLN2 ( $1.4 \times 10^{-2} \text{ mol} \cdot \text{L}^{-1}$ ) upon mixing with TBAF in  $\text{CD}_3\text{CN}$  at 293 K.

#### 4. UV-vis absorption spectra of CLN1 and CLN1 + TBAF in CH<sub>2</sub>Cl<sub>2</sub>

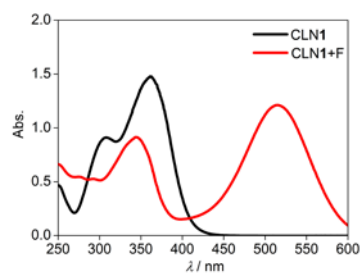

**Fig. 3** UV-vis absorption spectra of CLN1 and a mixture of CLN1 and 5 equiv. amounts of TBAF in CH<sub>2</sub>Cl<sub>2</sub> ( $4.0 \times 10^{-5} \text{ mol} \cdot \text{L}^{-1}$ ) at 298 K.

## 5. Mass spectra

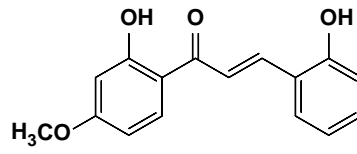

CLN1

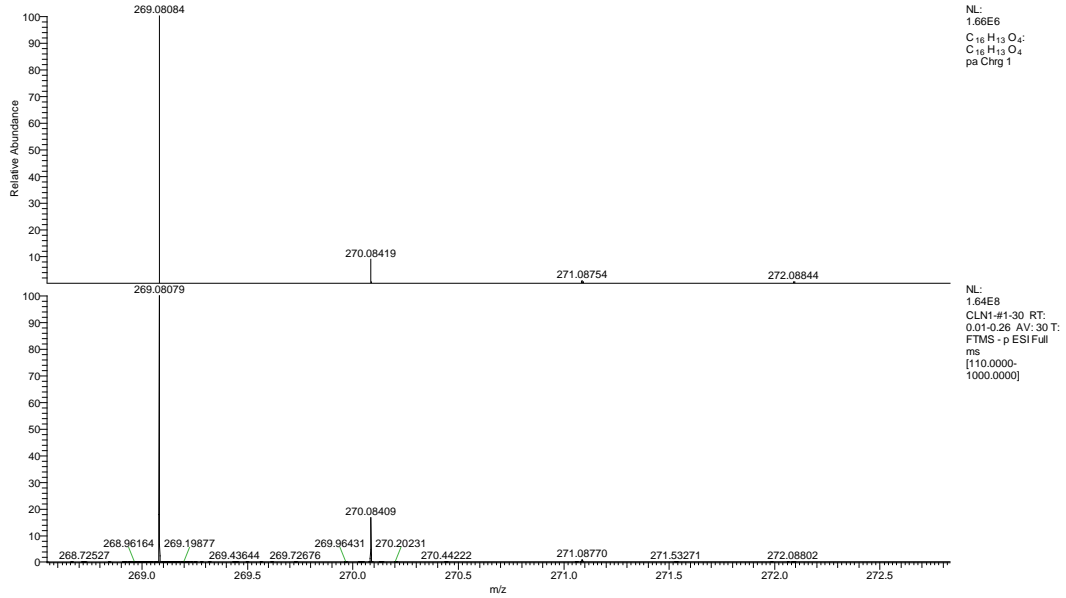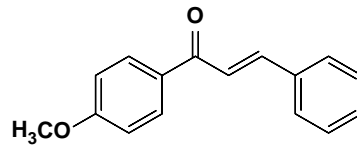

CLN2

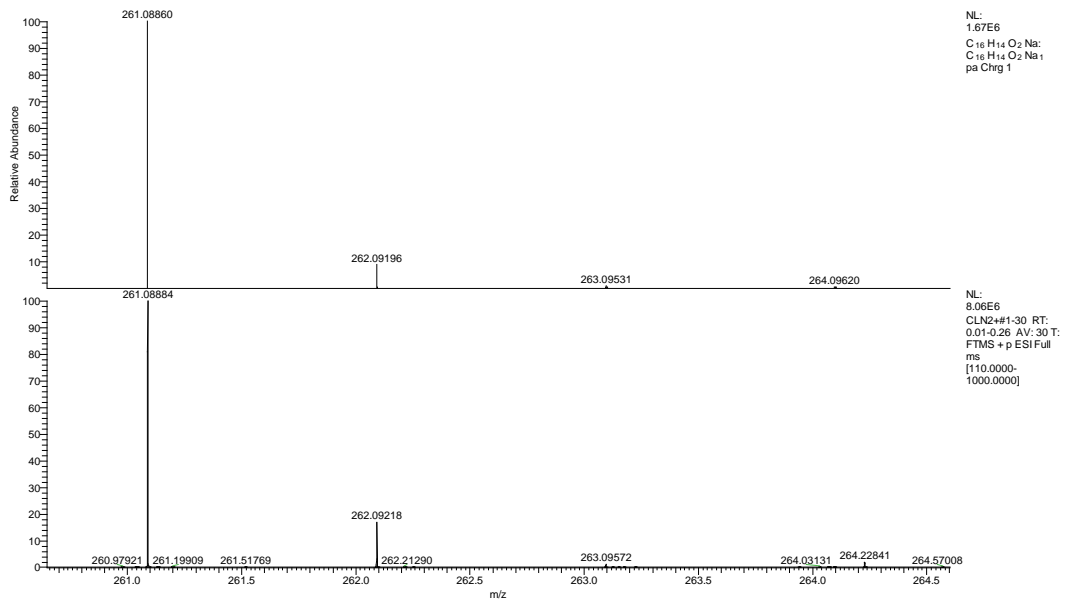



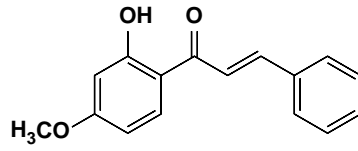

CLN3

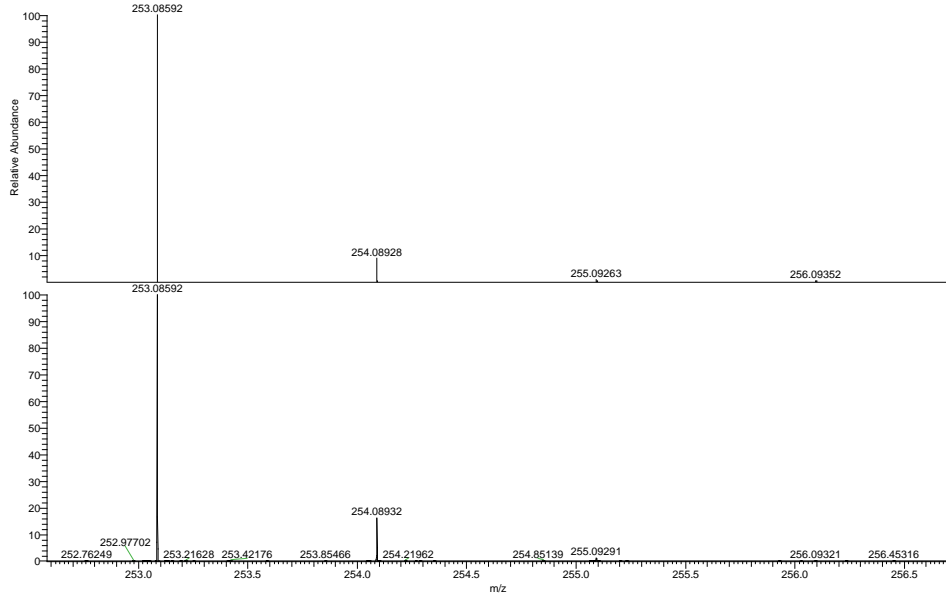

NL:  
1.67E6  
C<sub>16</sub>H<sub>13</sub>O<sub>3</sub><sup>+</sup>  
C<sub>16</sub>H<sub>13</sub>O<sub>3</sub>  
pa Chrg 1

NL:  
9.25E6  
CLN3-#1-30 RT:  
0.01-0.26 AV: 30 T:  
FTMS - p ESI Full  
ms  
[110.0000-  
1000.0000]

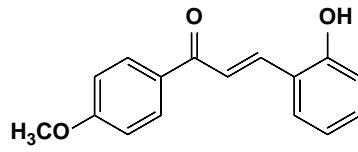

CLN4

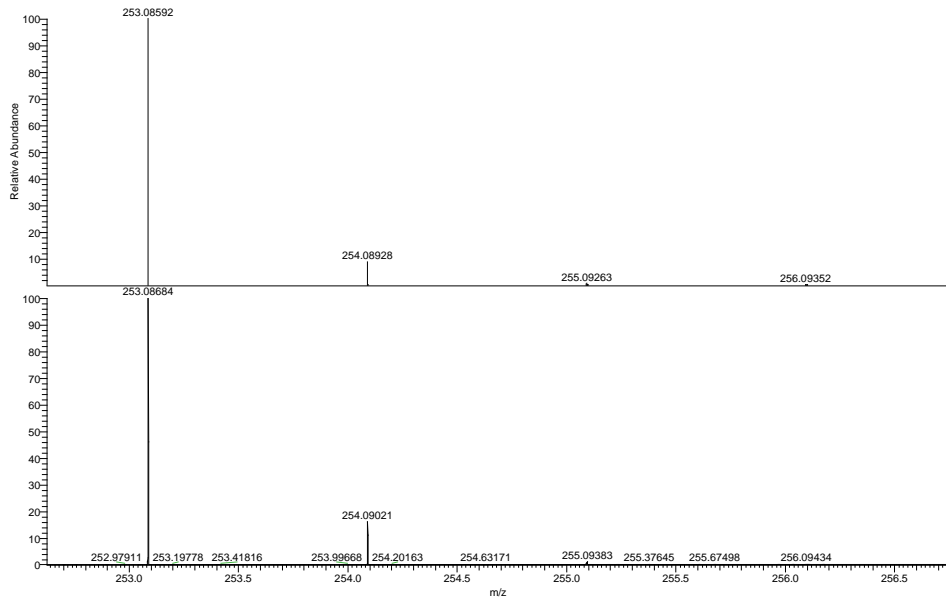

NL:  
1.67E6  
C<sub>16</sub>H<sub>13</sub>O<sub>3</sub><sup>+</sup>  
C<sub>16</sub>H<sub>13</sub>O<sub>3</sub>  
pa Chrg 1

NL:  
3.65E6  
CLN4-#1-30 RT:  
0.01-0.26 AV: 30 T:  
FTMS - p ESI Full  
ms  
[110.0000-  
1000.0000]

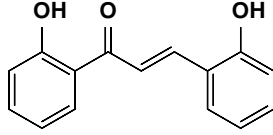

CLN5

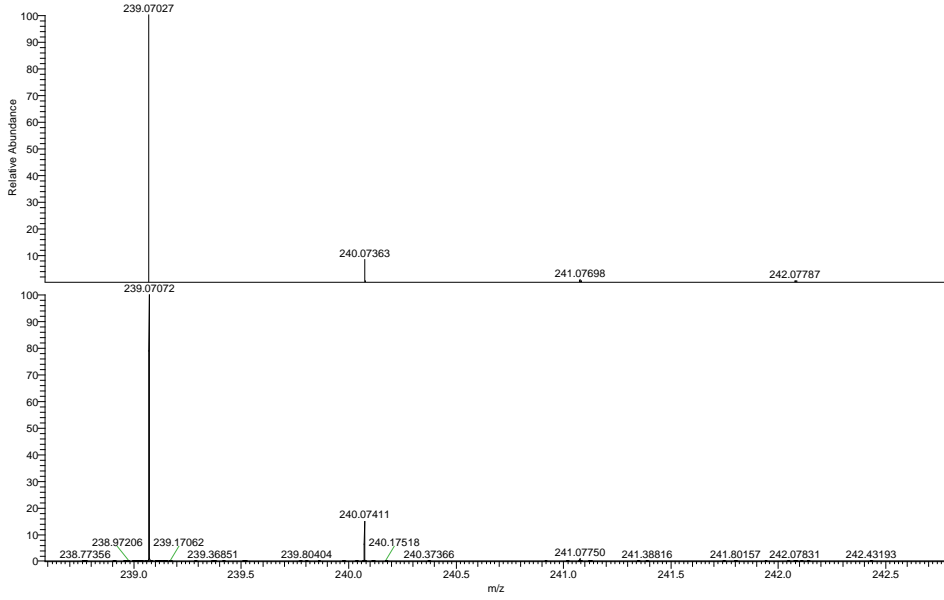

NL:  
1.69E6  
C<sub>15</sub>H<sub>11</sub>O<sub>2</sub>  
C<sub>15</sub>H<sub>11</sub>O<sub>3</sub>  
pa Chrg 1

NL:  
4.74E7  
CLN5-#1-30 RT:  
0.01-0.26 AV: 30 T:  
FTMS - p ESI Full  
ms  
[110.0000-  
1000.0000]

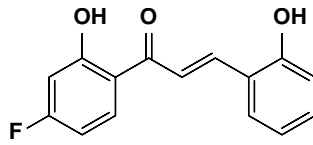

CLN6

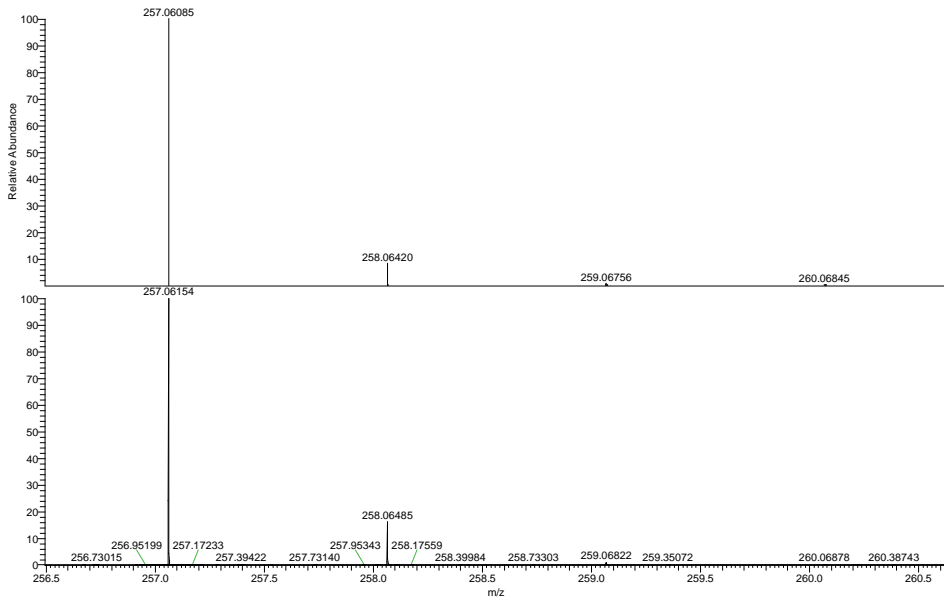

NL:  
1.69E6  
C<sub>15</sub>H<sub>10</sub>O<sub>3</sub>F  
C<sub>15</sub>H<sub>10</sub>O<sub>3</sub>F<sub>1</sub>  
pa Chrg 1

NL:  
1.55E8  
CLN6-#1-30 RT:  
0.01-0.26 AV: 30 T:  
FTMS - p ESI Full  
ms  
[110.0000-  
1000.0000]

## 6. $^1\text{H}$ and $^{13}\text{C}$ NMR spectra

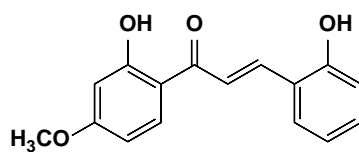

CLN1

$^1\text{H}$  NMR (600 MHz,  $\text{CD}_3\text{CN}$ , 293 K)

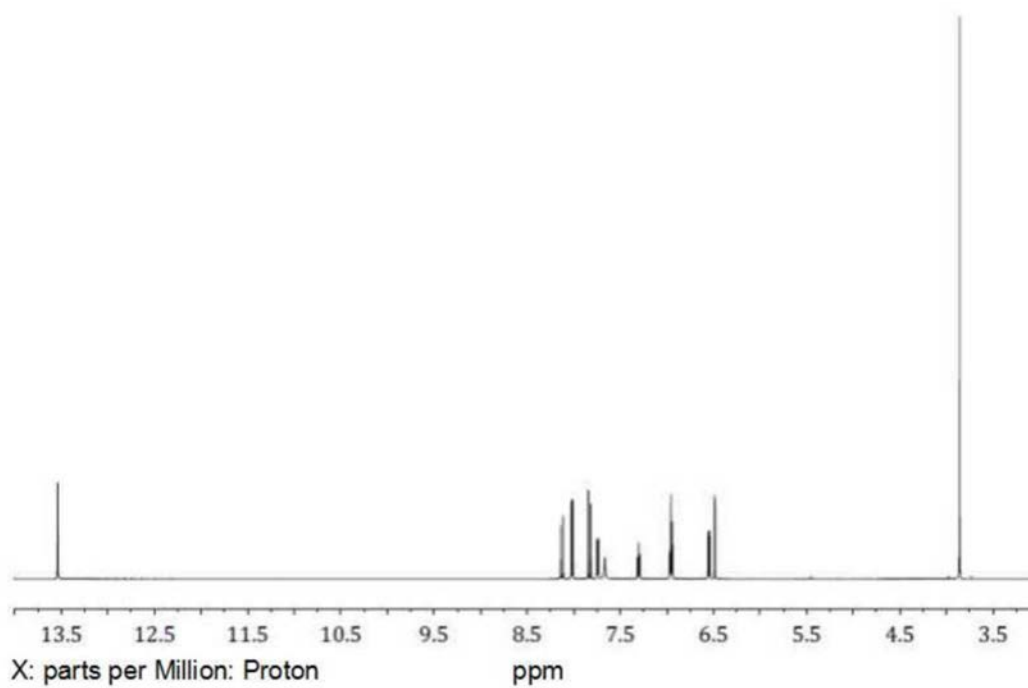

$^{13}\text{C}$  NMR (150 MHz,  $\text{CD}_3\text{CN}$ , 293 K)

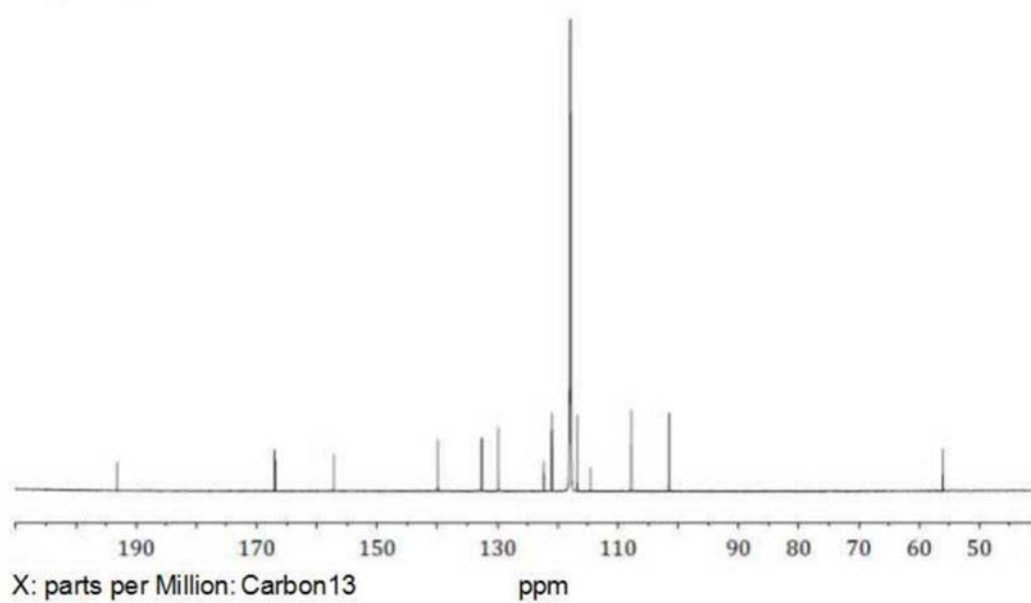

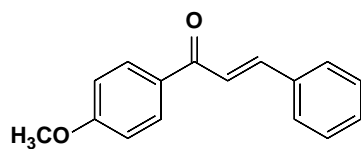

CLN2

$^1\text{H}$  NMR (500 MHz,  $\text{CD}_3\text{CN}$ , 293 K)

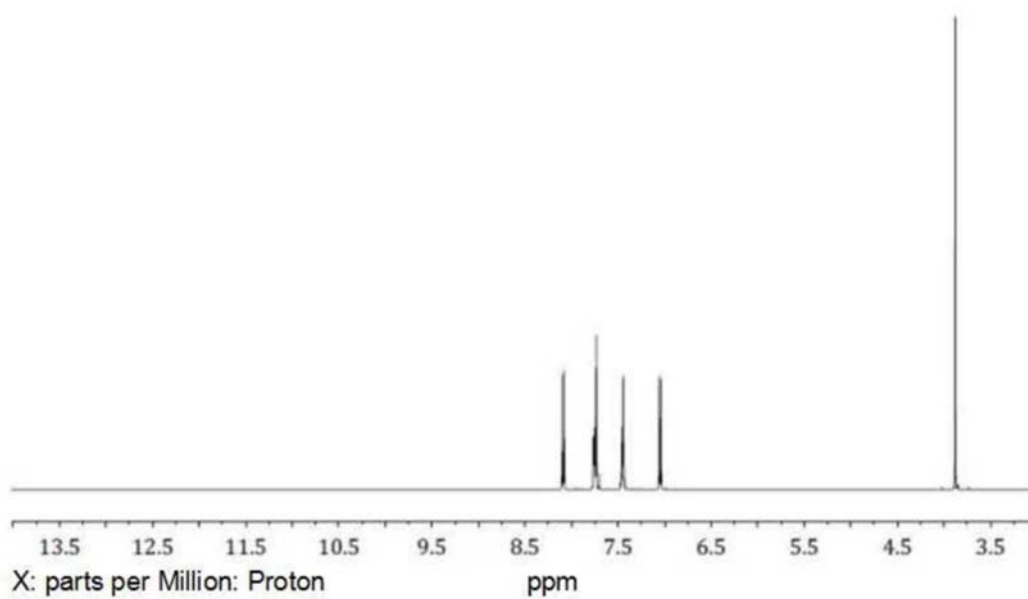

$^{13}\text{C}$  NMR (125 MHz,  $\text{CD}_3\text{CN}$ , 293 K)

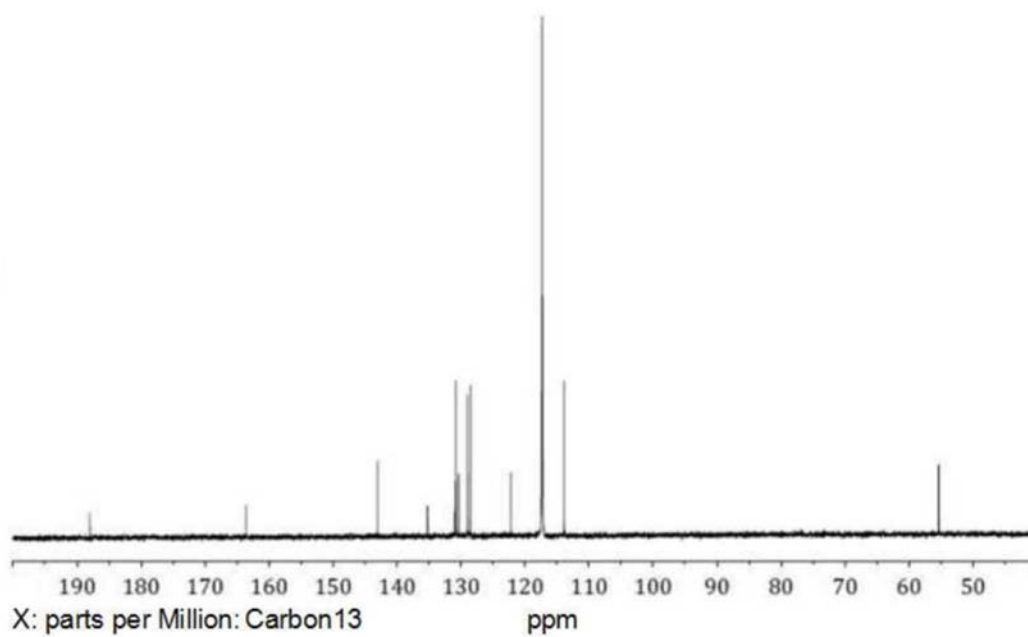

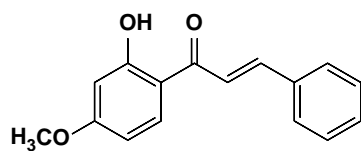

CLN3

$^1\text{H}$  NMR (500 MHz,  $\text{CD}_3\text{CN}$ , 293 K)

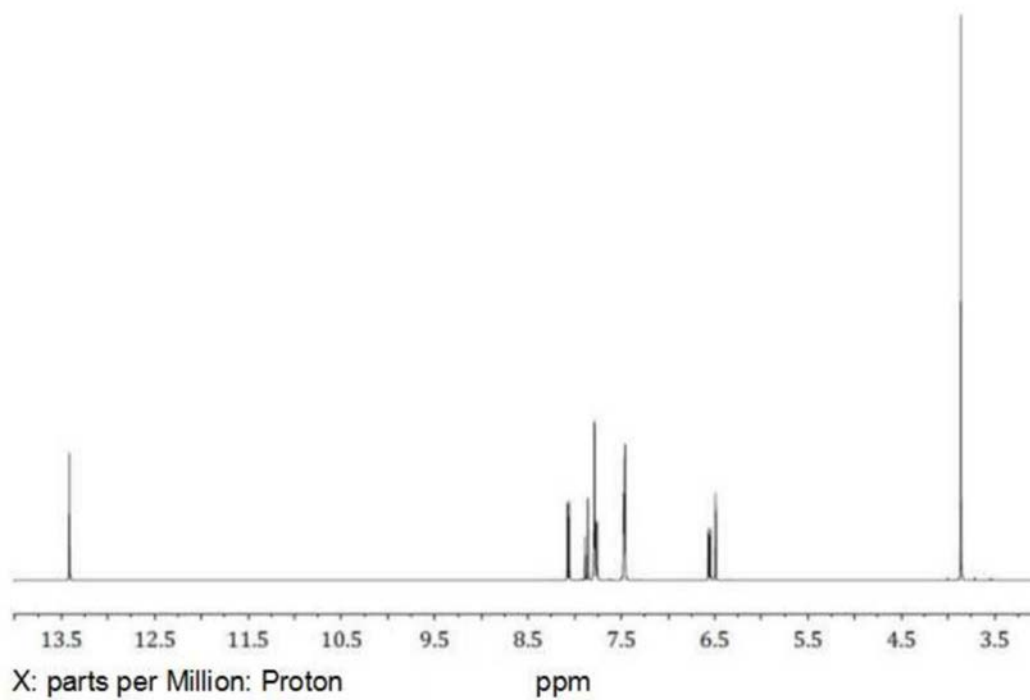

$^{13}\text{C}$  NMR (125 MHz,  $\text{CD}_3\text{CN}$ , 293 K)

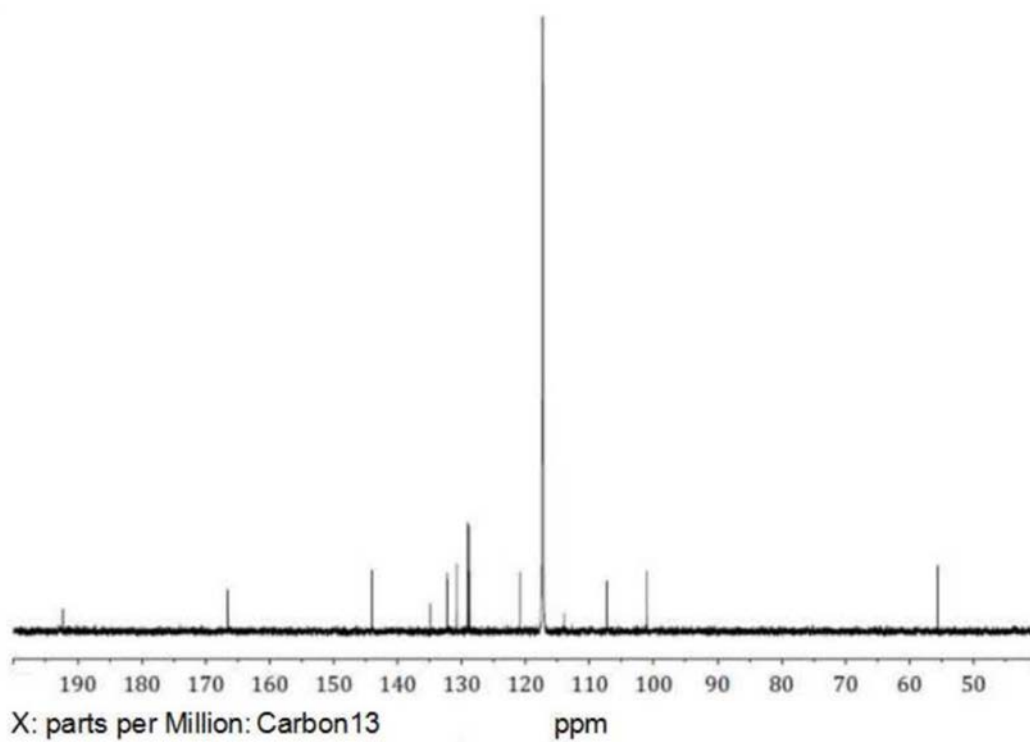

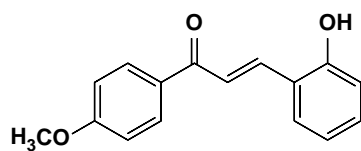

CLN4

$^1\text{H}$  NMR (600 MHz,  $\text{CD}_3\text{CN}$ , 293 K)

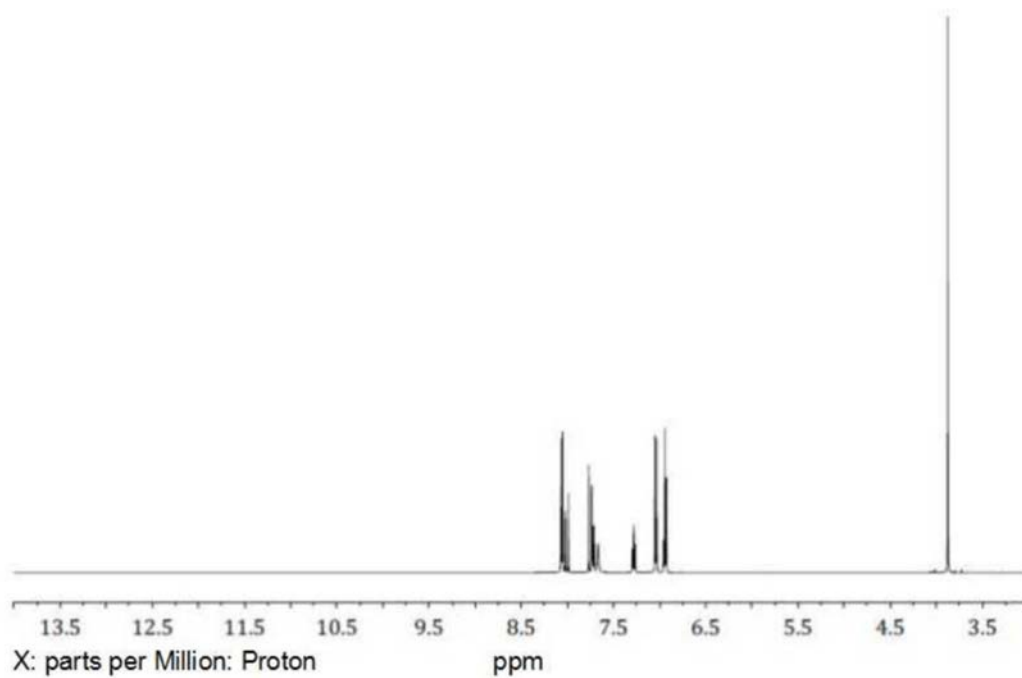

$^{13}\text{C}$  NMR (150 MHz,  $\text{CD}_3\text{CN}$ , 293 K)

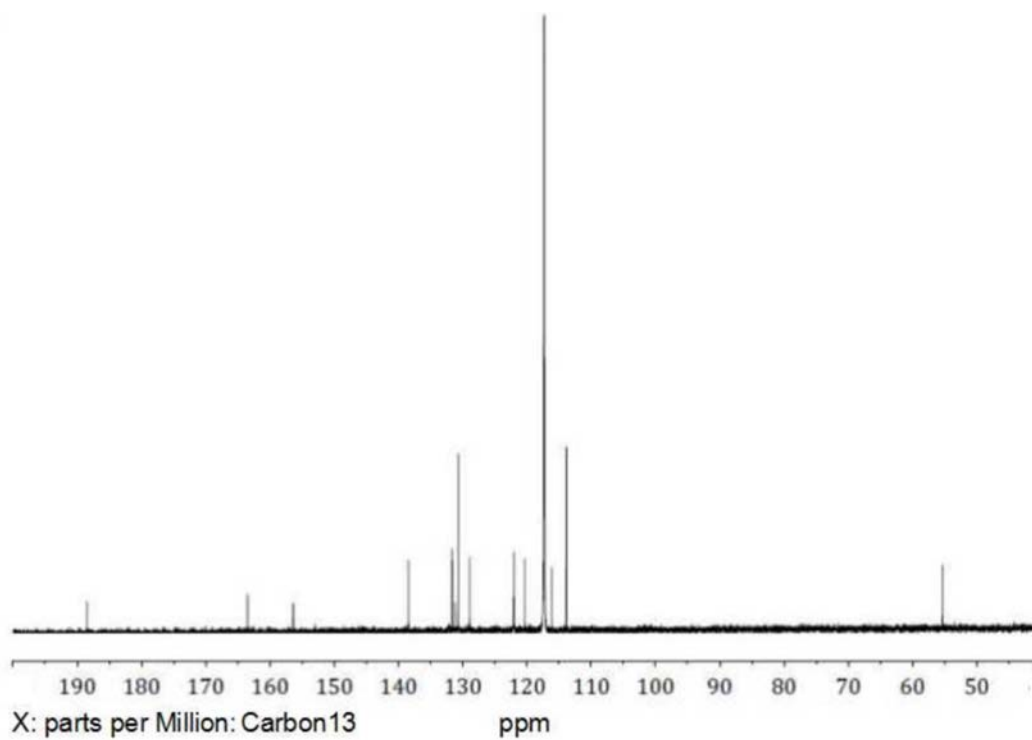

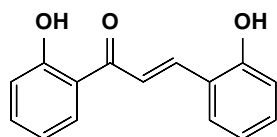

CLN5

$^1\text{H}$  NMR (500 MHz,  $\text{CD}_3\text{CN}$ , 293 K)

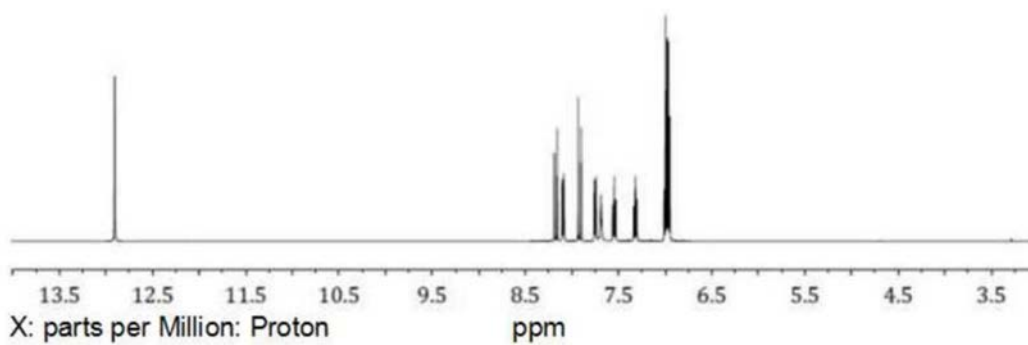

$^{13}\text{C}$  NMR (125 MHz,  $\text{CD}_3\text{CN}$ , 293 K)

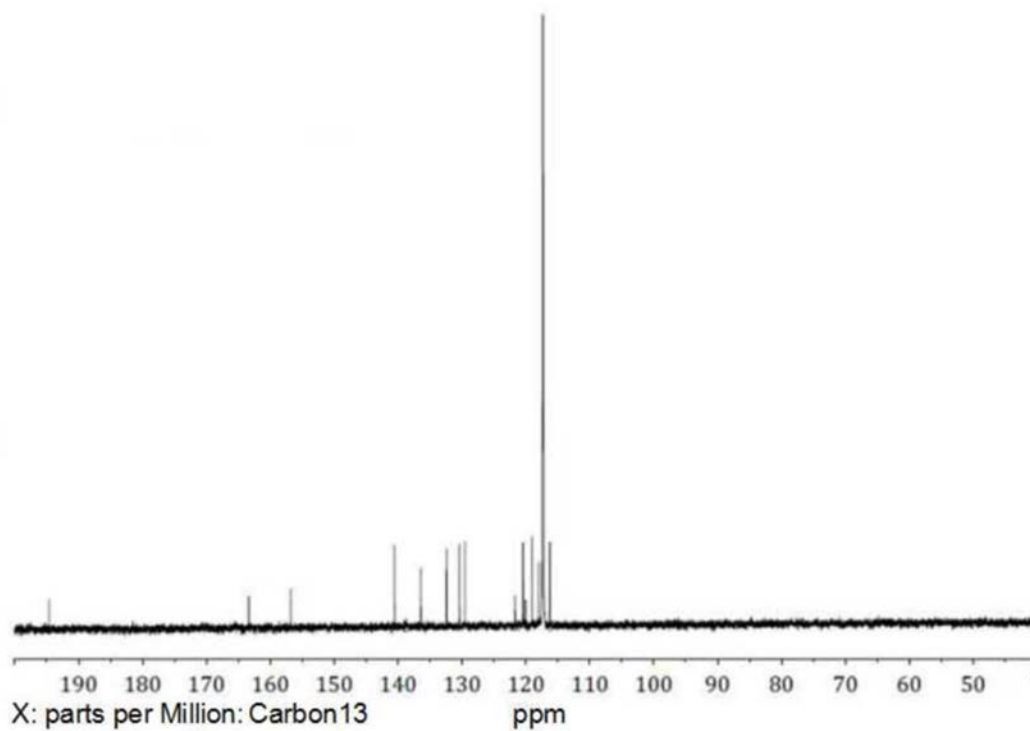

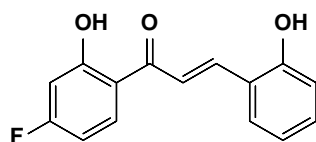

CLN6

$^1\text{H}$  NMR (500 MHz,  $\text{CD}_3\text{CN}$ , 293 K)

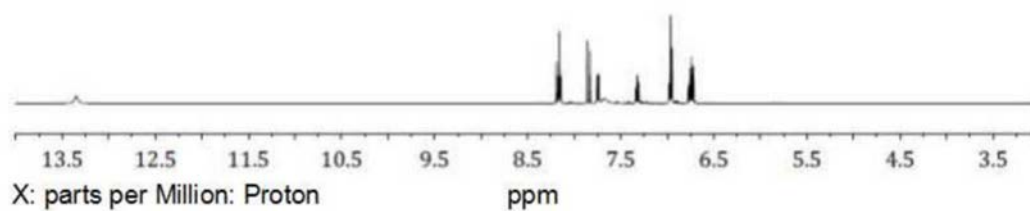

$^{13}\text{C}$  NMR (125 MHz,  $\text{CD}_3\text{CN}$ , 293 K)

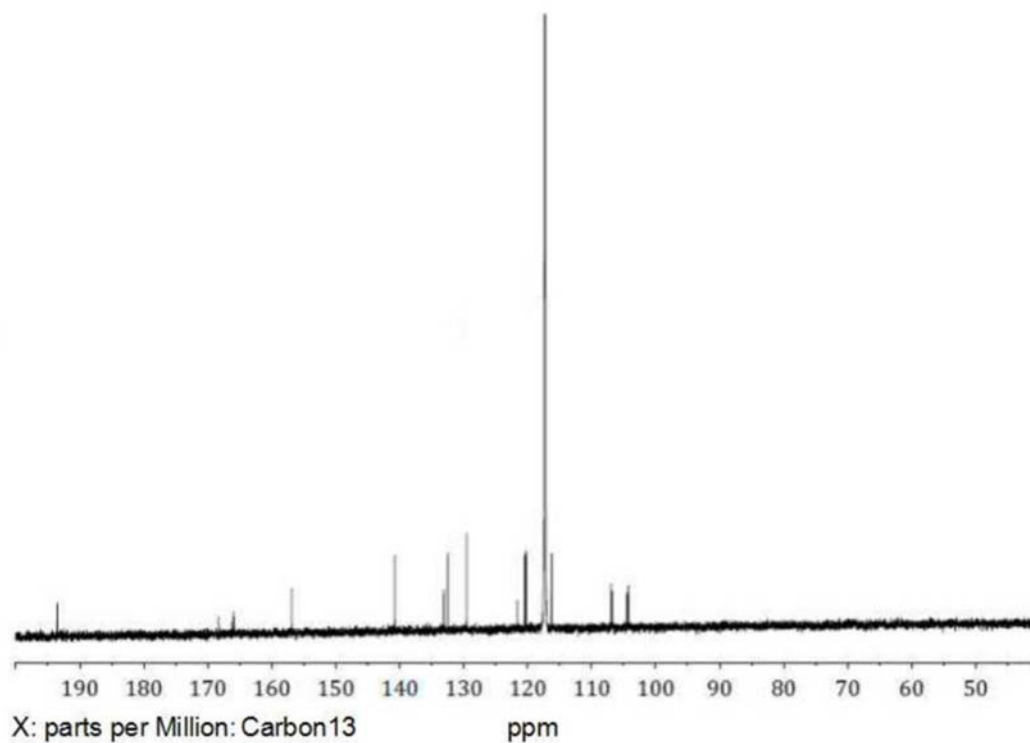

Supplement: d0ra06719a1.pdf [file d0ra06719a1.pdf]
